# Supplementary material for: An insight into intestinal mucosal microbiota disruption after stroke
Source: PubMed Central journal article supplement (PMC5766598; doi:10.1038/s41598-017-18904-8), 2018-01-12
Supplement: 41598_2017_18904_MOESM1_ESM.pdf [file 41598_2017_18904_MOESM1_ESM.pdf]

1 **An insight into intestinal mucosal microbiota disruption after**  
2 **stroke**

3

4 Dragana Stanley<sup>1</sup>, Robert J. Moore<sup>2,3</sup> and Connie H. Y. Wong<sup>4,§</sup>

5

6 1. School of Health Medical and Applied Sciences, Central Queensland University,  
7 Bruce Highway, Rockhampton, Queensland 4702, Australia. Email:

8 d.stanley@cqu.edu.au

9 2. School of Science, RMIT University, Bundoora, Victoria 3083, Australia. Email:

10 rob.moore@rmit.edu.au

11 3. Infection and Immunity Program, Biomedicine Discovery Institute, Department of  
12 Microbiology, Monash University, Clayton, Victoria 3800, Australia

13 4. Centre for Inflammatory Diseases, Department of Medicine, School of Clinical  
14 Sciences, Monash University, Clayton, Victoria 3168, Australia. Email:

15 connie.wong@monash.edu

16

17 §Address for correspondence: Connie H. Y. Wong, PhD., Centre for Inflammatory Diseases,

18 Department of Medicine, School of Clinical Sciences, Monash Medical Centre, Monash

19 University, Clayton, VIC 3168 Australia; Email: connie.wong@monash.edu

20

21

22 **SUPPLEMENTARY FIGURES: 4**

23

24

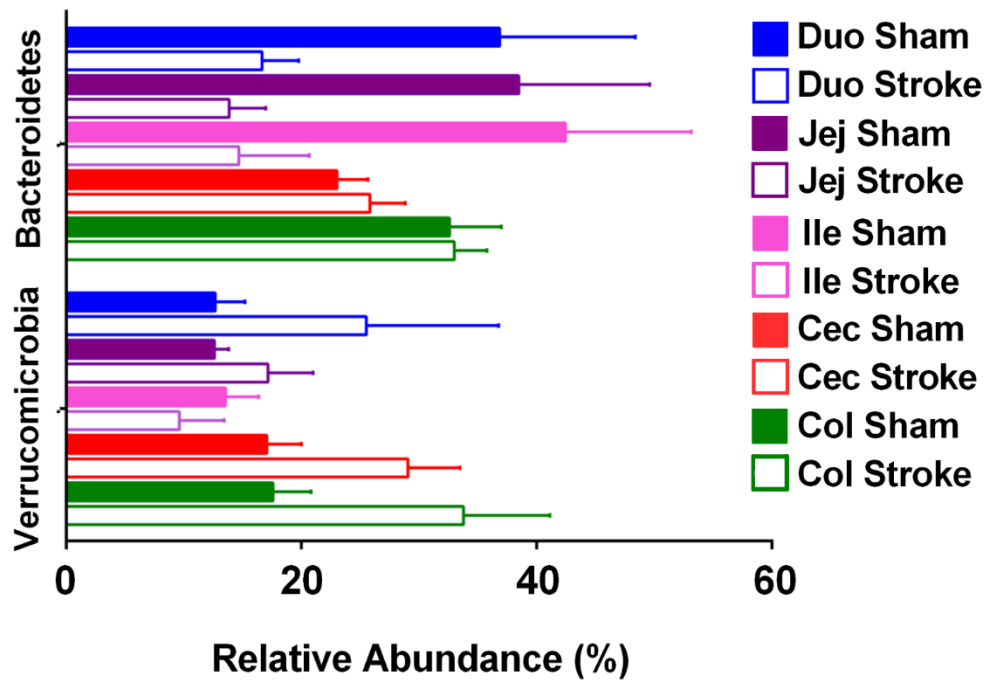

25

26

27 **Supplementary Figure 1:** Phylum Bacteroidetes was significantly decreased ( $P=5.3E^{-3}$ ) and

28 Verrucomicrobia ( $P=0.045$ ) were markedly increased in the intestinal mucosal samples

29 isolated from post-stroke mice as compared to sham-operated counterparts, consistently

30 across all 5 GIT sections.  $n = 5$  per group.

31

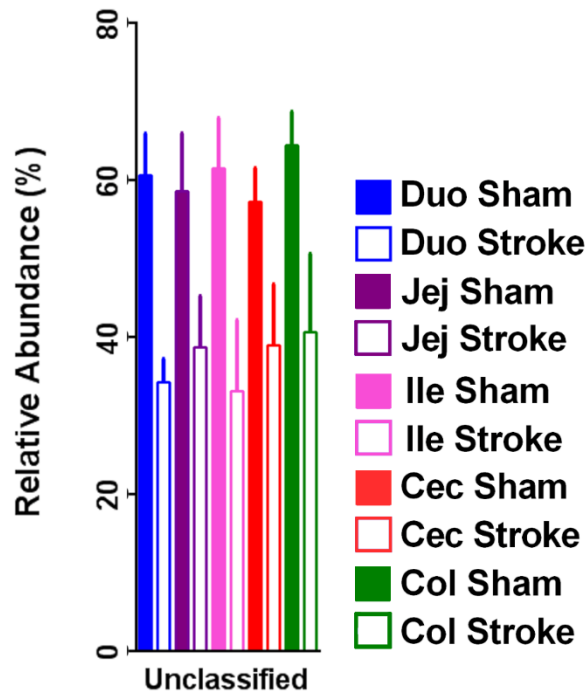

32

33 **Supplementary Figure 2:** Genera Unclassified elevated significantly (ANOVA) across the  
 34 GIT sections after stroke. GIT sections are abbreviated in labels: duodenum (Duo), jejunum  
 35 (Jej), ileum (Ile), cecum (Cec), and colon (Col).  $n = 5$  per group.

36

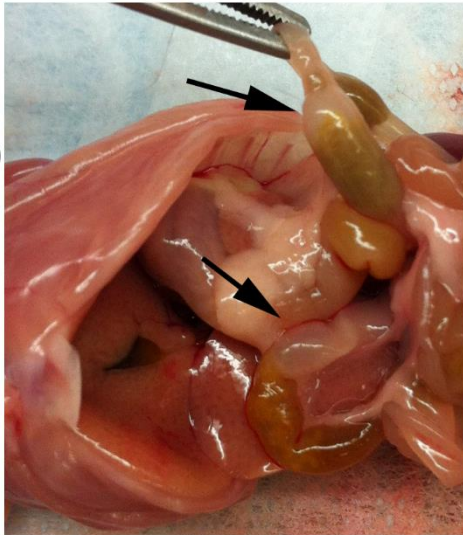

37

38 **Supplementary Figure 3:** Representative image of the presence of multiple gas pockets,  
39 denoted by black arrows, in the small intestine of post-stroke mice that were completely  
40 absent in sham-operated counterparts.

41

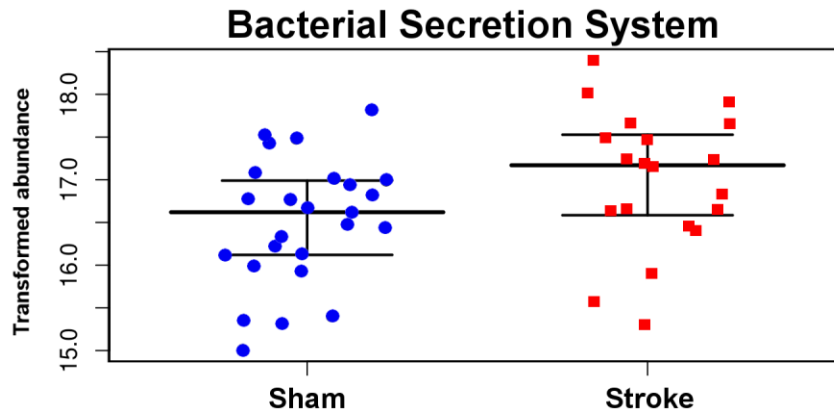

42

43 **Supplementary Figure 4:** KEGG level 3 *Bacterial Secretion System* category was  
44 significantly ( $P=0.042$ ) higher represented in stroke than in sham mucosa. Y axes represents  
45 log<sub>2</sub> transformed functional category abundance.

46
